# Supplementary material for: The Relationships between Various Factors and Sleep Status: A Cross-Sectional Study among Healthy Saudi Adults
Source: MDPI journal article supplement (doi:10.3390/nu15184090), 2023-09-21
Supplement: s1 [file s1]

**Table S1.** General characteristics of the participants (n= 487).

| Characteristics                             | n (%)             |
|---------------------------------------------|-------------------|
| <b>Age (years)</b>                          | 35.19 ± 12.74     |
| <b>Sex</b>                                  |                   |
| Males                                       | 166 (34.1%)       |
| Females                                     | 321 (65.9%)       |
| <b>Education</b>                            |                   |
| Secondary or less                           | 127 (26.1%)       |
| University                                  | 360 (73.9%)       |
| <b>Family income (&gt;10,000 SAR/month)</b> |                   |
| <10000 (SAR)                                | 183 (37.7%)       |
| ≥10000 (SAR)                                | 302 (62.3%)       |
| <b>Marital status</b>                       |                   |
| Married                                     | 235 (48.3%)       |
| Single                                      | 252 (51.7%)       |
| <b>Anthropometrics</b>                      | <b>Mean ± SD</b>  |
| BMI (kg/m <sup>2</sup> )                    | 27.77 ± 6.15      |
| NC (cm)                                     | 35.15 ± 4.07      |
| WC (cm)                                     | 87.03 ± 16.64     |
| WHR (ratio)                                 | 0.86 ± 0.11       |
| Fat percentage %                            | 36.02 ± 10.58     |
| Muscle mass (kg)                            | 34.64 ± 11.44     |
| <b>Labs</b>                                 |                   |
| Fasting glucose levels (mg/dL)              | 92.85 ± 18.68     |
| Fasting insulin levels (μU/mL)              | 11.47 ± 17.74     |
| Cholesterol (mg/dL)                         | 183.31 ± 40.70    |
| Triglycerides (mg/dL)                       | 87.24 ± 56.23     |
| LDL (mg/dL)                                 | 108.41 ± 33.36    |
| HDL (mg/dL)                                 | 52.59 ± 12.06     |
| <b>Diet</b>                                 |                   |
| Energy intake (kcal/day)                    | 4229.06 ± 1878.03 |
| Fat (gm)                                    | 70.13 ± 41.42     |
| Carbohydrates (gm)                          | 236.99 ± 135.53   |
| Proteins (gm)                               | 73.67 ± 42.59     |
| <b>Physical activity</b>                    |                   |
| Total MET                                   | 1515.04 ± 2658.88 |
| Sitting                                     | 37.84 ± 12.75     |
| <b>Sleep</b>                                |                   |
| PSQI                                        | 8.16 ± 3.44       |
| Sleep duration                              |                   |
| >7 hours                                    | 133 (27.4%)       |
| 6-7 hours                                   | 76 (15.6%)        |
| 5-6 hours                                   | 126 (25.9%)       |
| <5 hours                                    | 151 (31.1%)       |
| <b>Stress (PSS)</b>                         | 16.99 ± 7.19      |
| <b>Smoking</b>                              |                   |
| No                                          | 422 (86.7%)       |
| Yes                                         | 65 (13.3%)        |

BMI: body mass index; NC: neck circumference; WC: waist circumference; WHR: Waist to hip ratio; HDL: high-density lipoprotein; LDL: low-density lipoprotein; MET: metabolic equivalent; PSQI: Pittsburgh Sleep Quality Index; PSS: perceived stress scale.
